# Supplementary material for: HOX gene expression in the developing human spine
Source: Springer Nature journal article supplement (doi:10.1038/s41467-024-54187-0), 2024-11-20
Supplement: MOESM1 [file 41467_2024_54187_MOESM1_ESM.pdf]

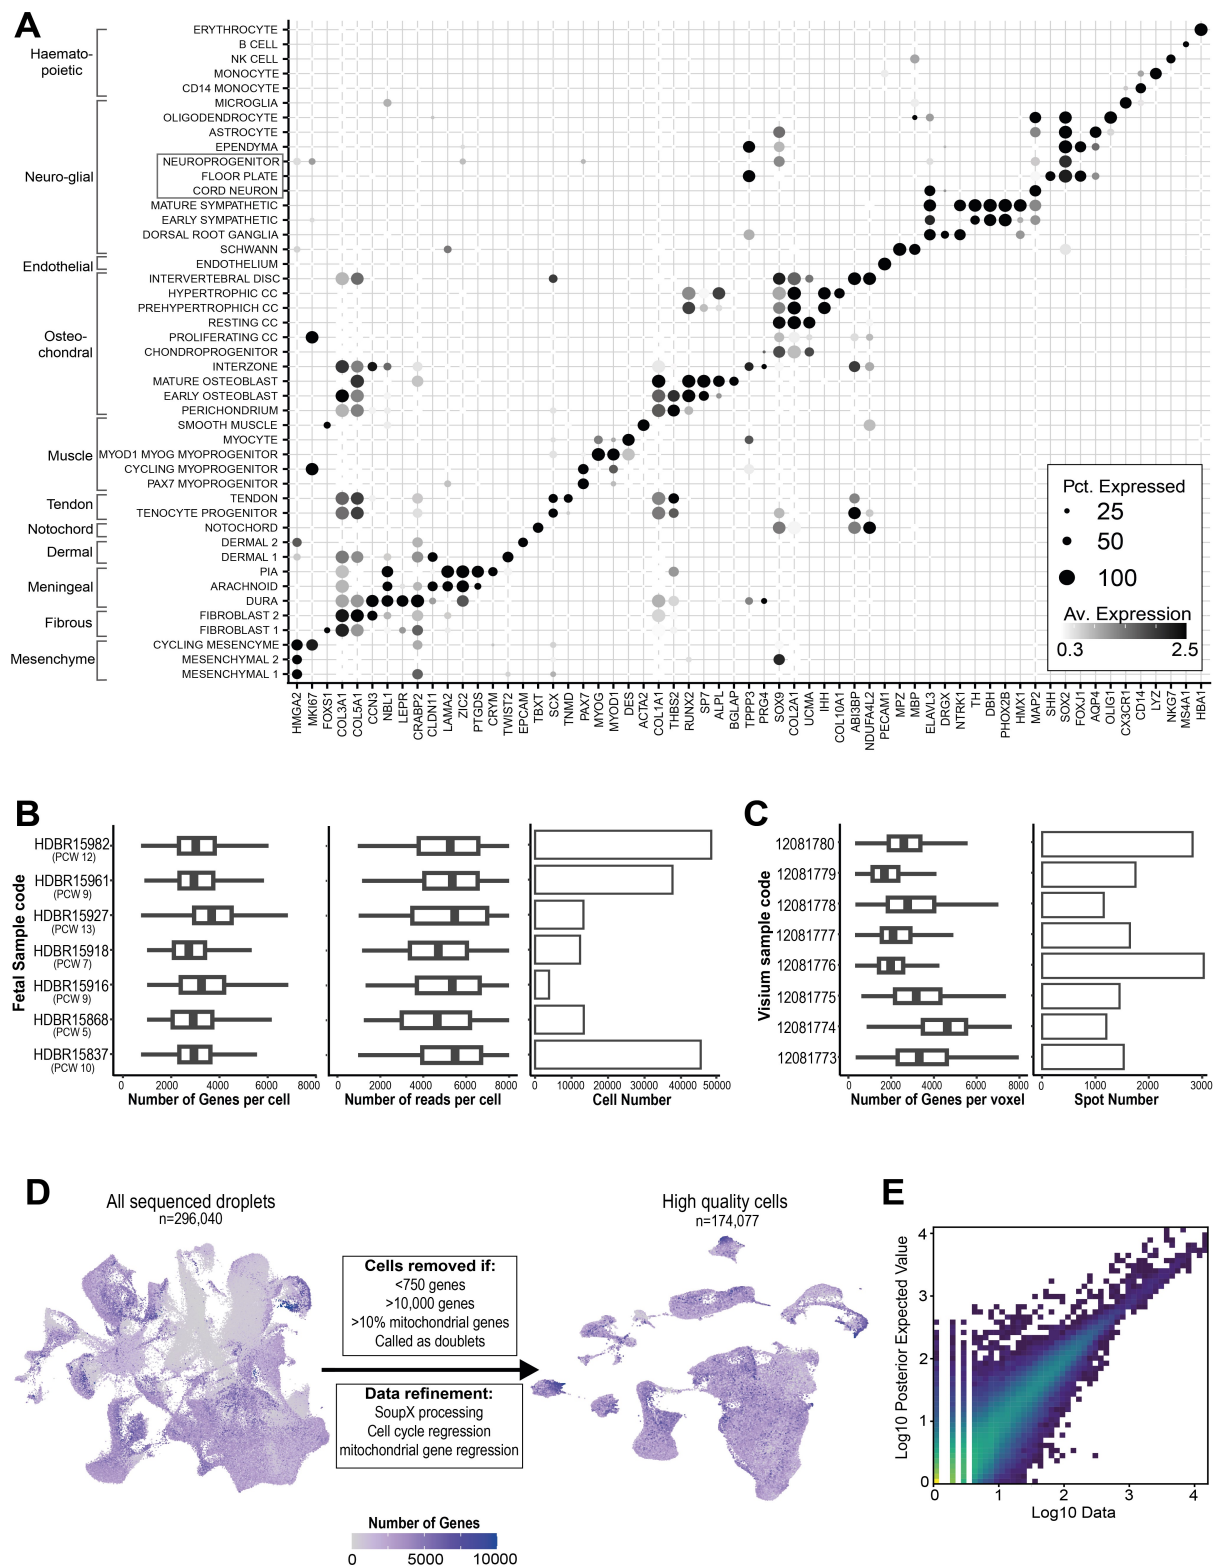

### Supplementary Figure 1. Quality control and spinal atlas marker genes

(A) Dotplot of mean log-normalised expression values of marker genes amongst cells of the fetal spine. Point size shows the percentage of cells with non-zero expression. Grey box denotes cells sub-clustered for analysis in Fig.2. For references for marker genes see Supplementary Data 1. CC, chondrocyte; Pct. Exp, percentage of expressing cells; Av. Exp, average expression in cell type.

(B) Quality control plots for single cell data. Left panel - Number of genes expressed per cell in each fetal sample. Middle panel - number of sequencing reads per cell for each sample. Right plot - number of cells captured from each fetal sample

(C) Quality control plots for Visium spatial transcriptomics data. Left panel - Number of genes expressed in each capture area. Right plot - number of voxels sequenced from each capture area.

(D) Uniform manifold approximation and projection (UMAP) plot visualising single cell RNA sequencing data with (right panel) and without (left panel) quality control measures.

(E) Scatter plot showing reconstruction accuracy of cell2location data

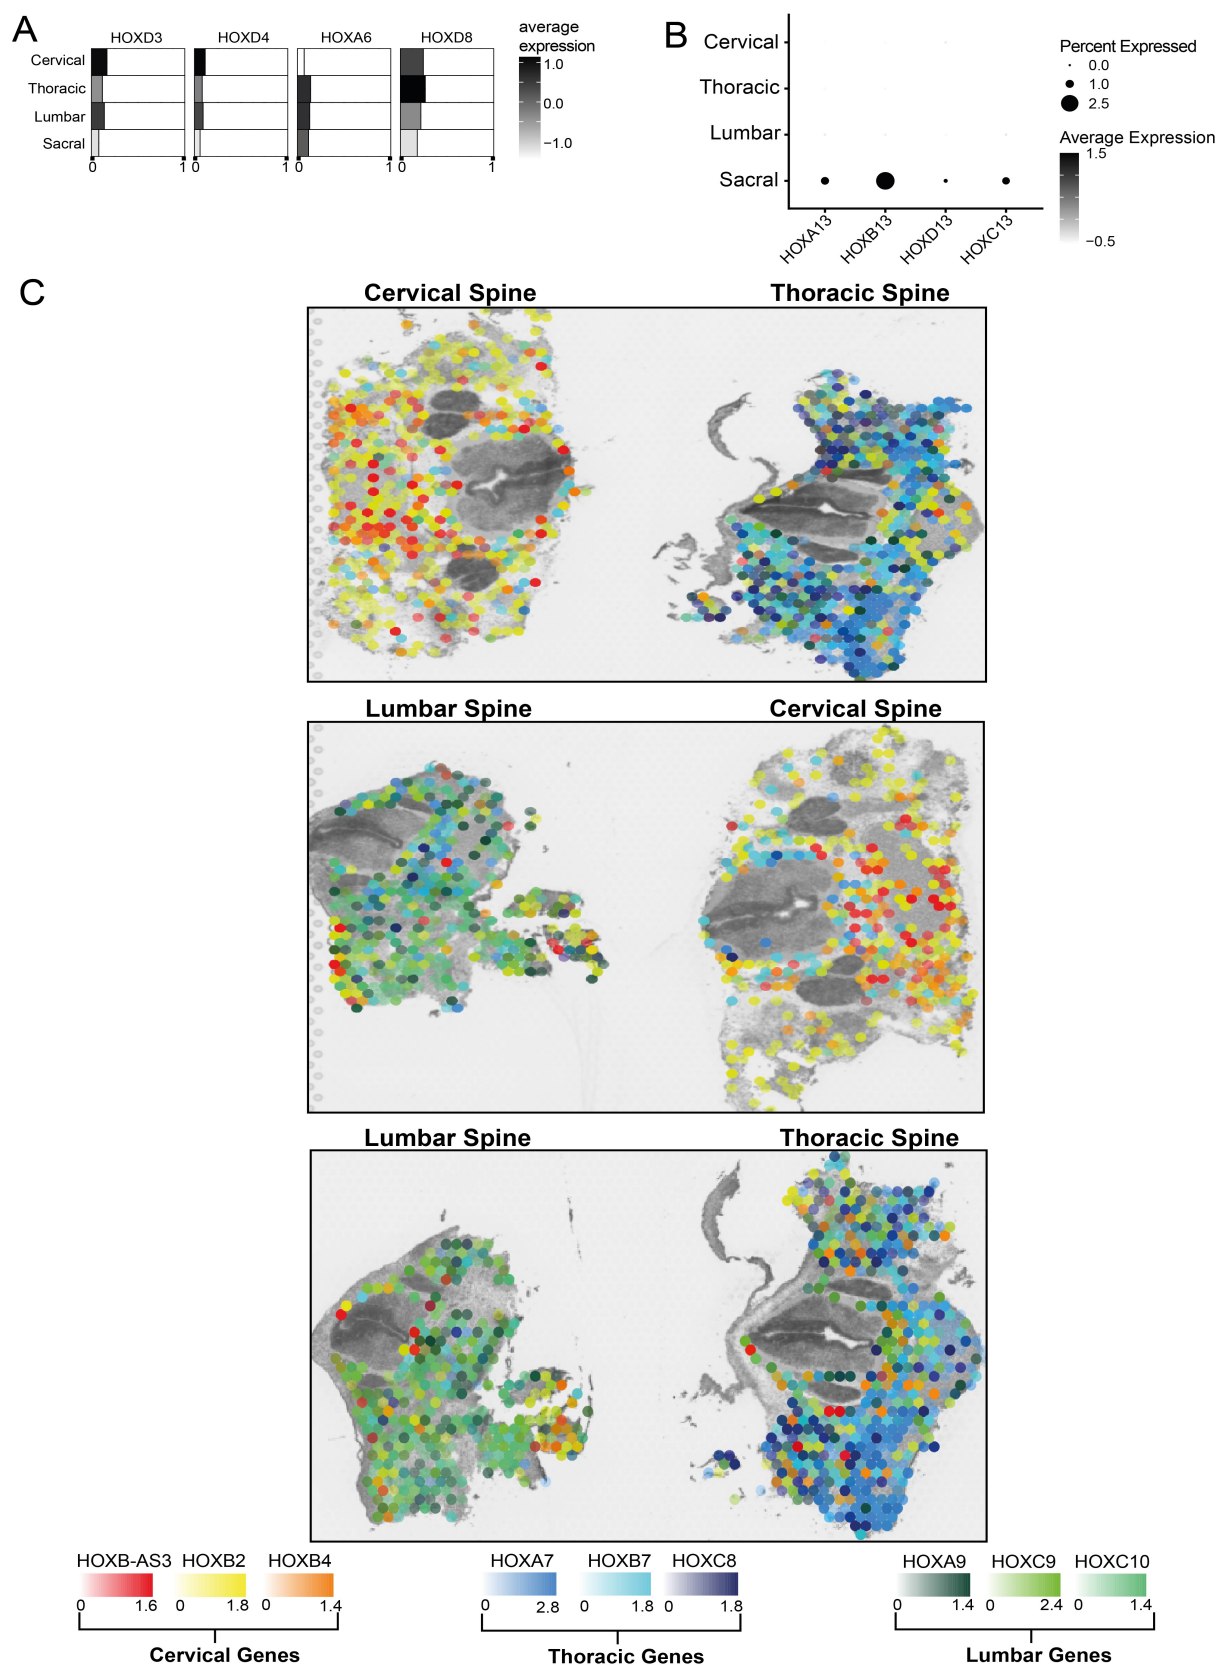

**Supplementary Figure 2. HOX gene filtering and spatial transcriptomic data**

(A) Barplots quantifying log-normalised expression across spinal segments of HOX genes with idiosyncratic expression patterns in tenocytes. Bar length corresponds to the fraction of cells with non-zero expression.

(B) Dotplot of mean log-normalised expression values of group 13 HOX genes amongst stationary cell type cells. Point size shows the percentage of cells with non-zero expression.

(C) Spatial heatmaps of all PCW7 spatial transcriptomic samples showing log-normalised values of HOX gene expression



**A**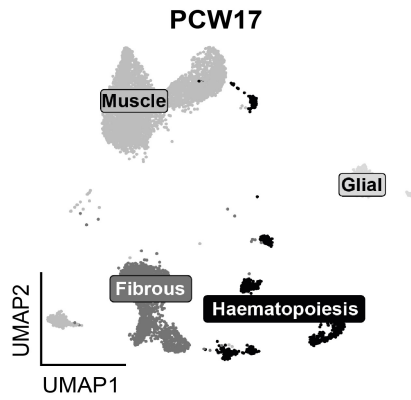**B**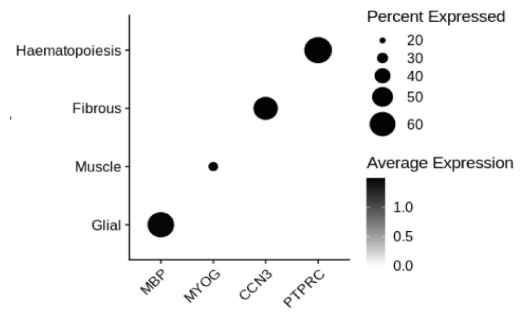**C**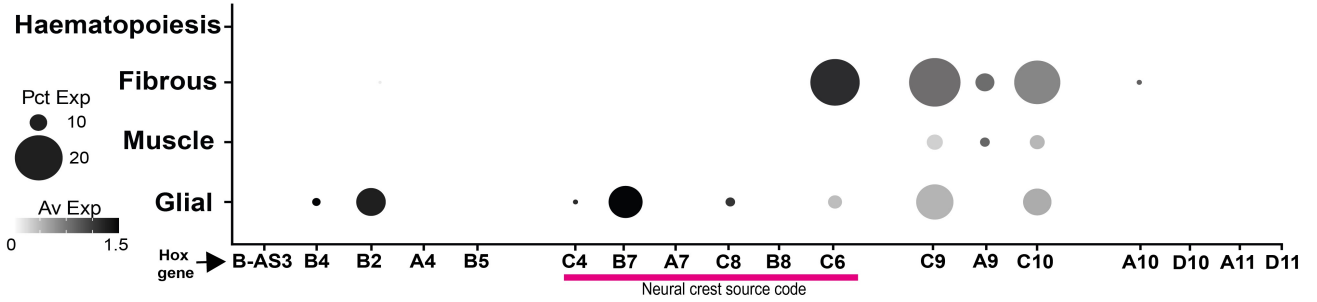**D**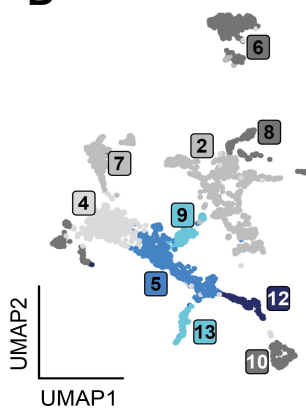**E**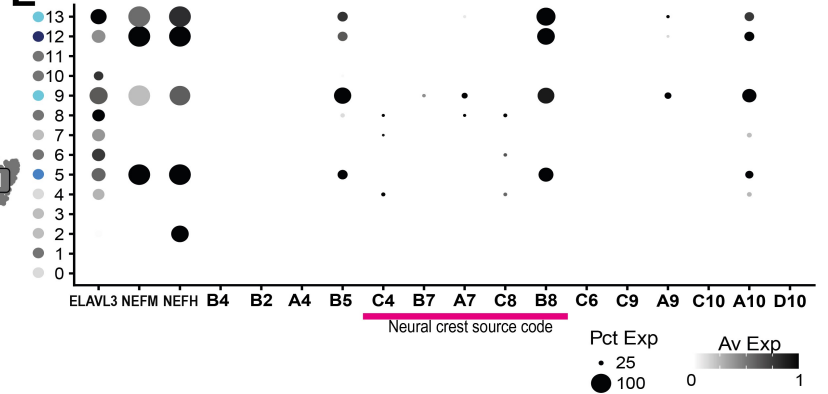**F**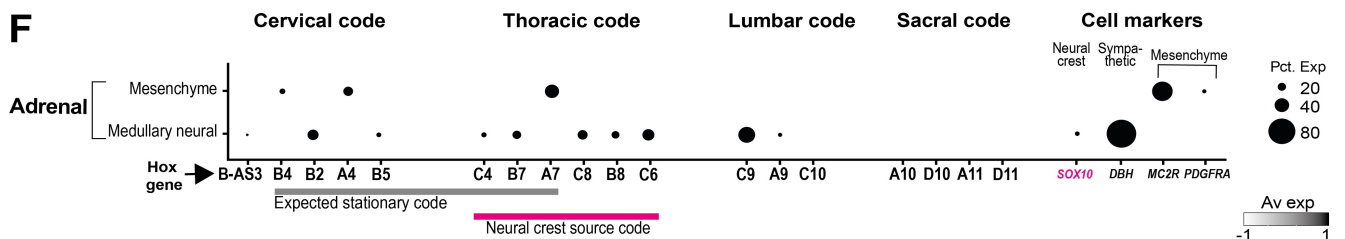**G**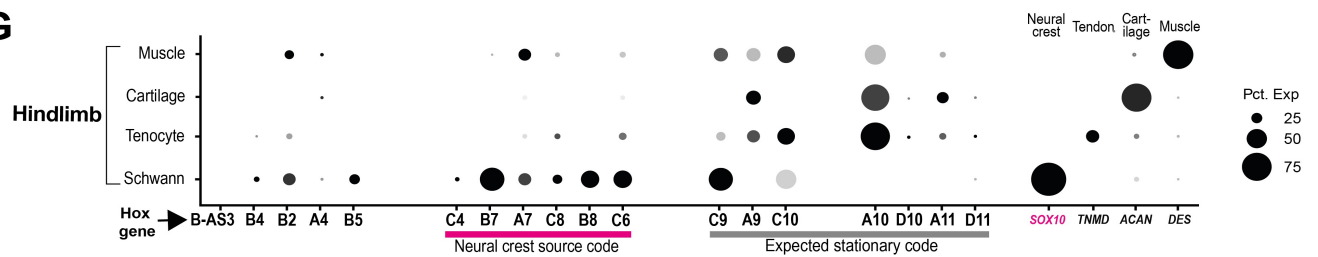



**Supplementary Figure 4. HOX gene expression in 2nd trimester and adult lumbar dorsal root ganglia, the developing adrenal gland and developing hindlimb.**

**(A)** Uniform manifold approximation and projection of 9,555 PCW17 lumbar fetal spinal cells, shaded by category.

**(B)** Dotplot of mean log-normalised expression values of classical marker genes amongst cells depicted in (A). Point size shows the percentage of cells with non-zero expression

**(C)** Dotplot of mean log-normalised expression values of HOX genes amongst cell clusters depicted in A. Point size shows the percentage of cells with non-zero expression. Pct Exp, Percentage of cells expressing; Av exp, Average expression in group.

**(D)** Uniform manifold approximation and projection of 6,307 adult L4&5 dorsal root ganglia cells, shaded by category. Blue shades represent HOX-expressing cells.

**(E)** Dotplot of mean log-normalised expression values of neuronal marker genes and HOX genes amongst cell clusters depicted in D. Point size shows the percentage of cells with non-zero expression. Y axis dot colour corresponds to colour on UMAP in D. Pct Exp, Percentage of cells expressing; Av exp, Average expression in group.

**(F)** Dotplot of mean log-normalised expression values of neuronal and mesenchymal marker genes and HOX genes amongst cells of the fetal adrenal gland. Point size shows the percentage of cells with non-zero expression. Pct Exp, Percentage of cells expressing; Av exp, Average expression in group.

**(G)** Dotplot of mean log-normalised expression values of neuronal, tenocyte, cartilage and muscle marker genes and HOX genes amongst cells of the fetal hindlimb. Point size shows the percentage of cells with non-zero expression. Pct Exp, Percentage of cells expressing; Av exp, Average expression in group.

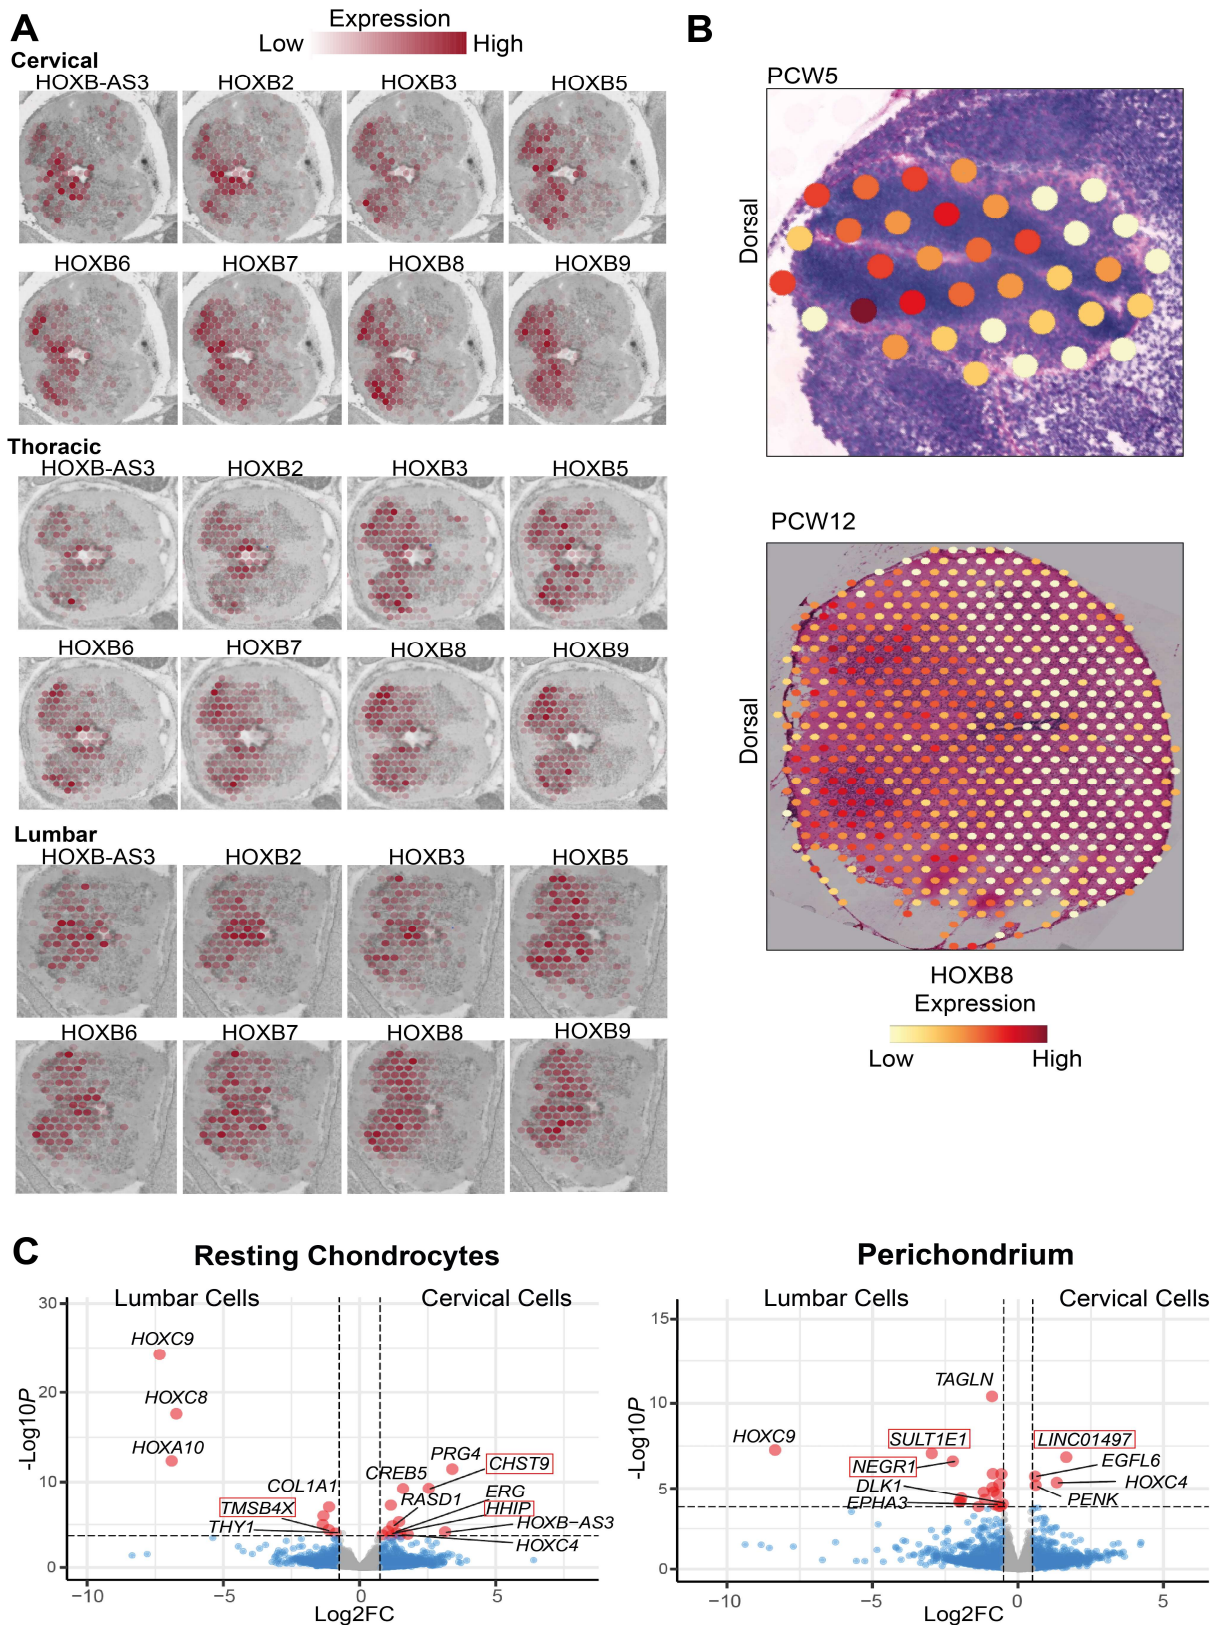

**Supplementary Figure 5. HOXB gene expression in the fetal spinal cord.**

(A) Spatial heatmaps of all HOXB group genes expressed in the Post-conception week 9 fetal cord across three anatomical levels.

(B) Spatial heatmaps of all HOXB8 expression in the developing cord at Post-conception week 5 and 12. PCW, post-conception week.

(C) Volcano plots of differentially expressed genes between lumbar and cervical regions in perichondrium and resting chondrocytes. Red boxes indicate region-specific genes discussed in the text. Red dots represent genes that are significantly differentially expressed. Blue and grey dots represent genes not reaching significance.
